# Supplementary material
Source: Springer Nature journal article supplement (https://www.springermedizin.de/resource/supplementary/12959_2013_228_MOESM3_ESM.pdf/9569242)
Supplement: MOESM3 [file 9569242]

# Prothrombin Time

Effect of dabigatran and rivaroxaban (prophylactic dosages) in dependence of drug administration and thromboplastin reagent

## Dabigatran

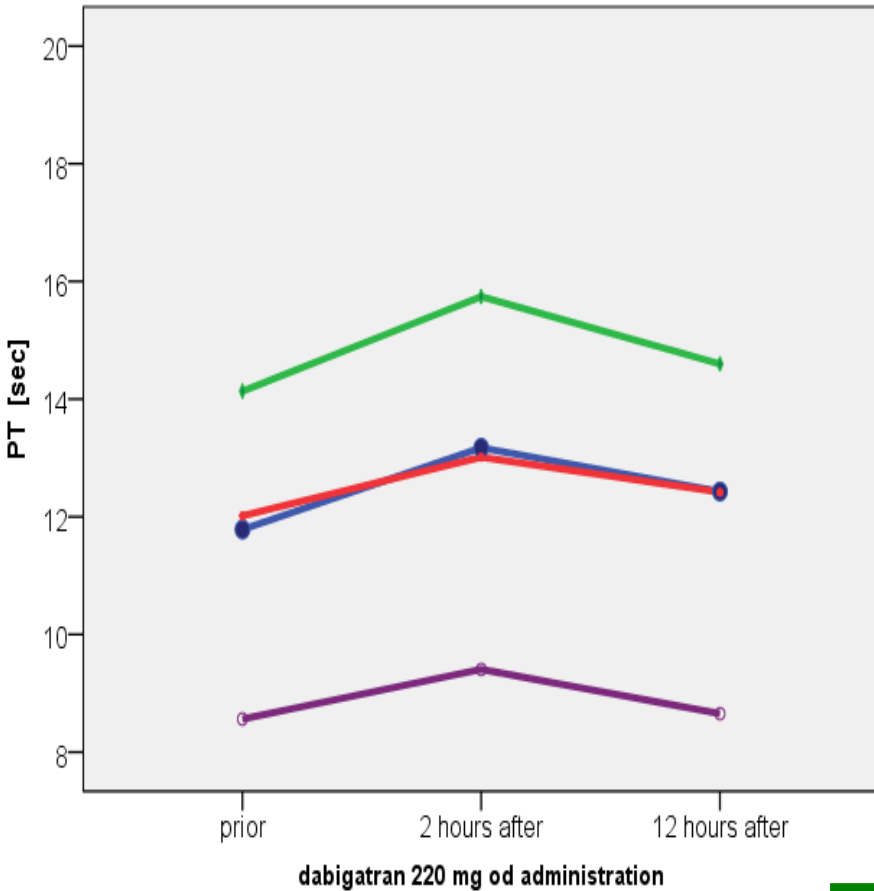

dabigatran 220 mg od administration

## Rivaroxaban

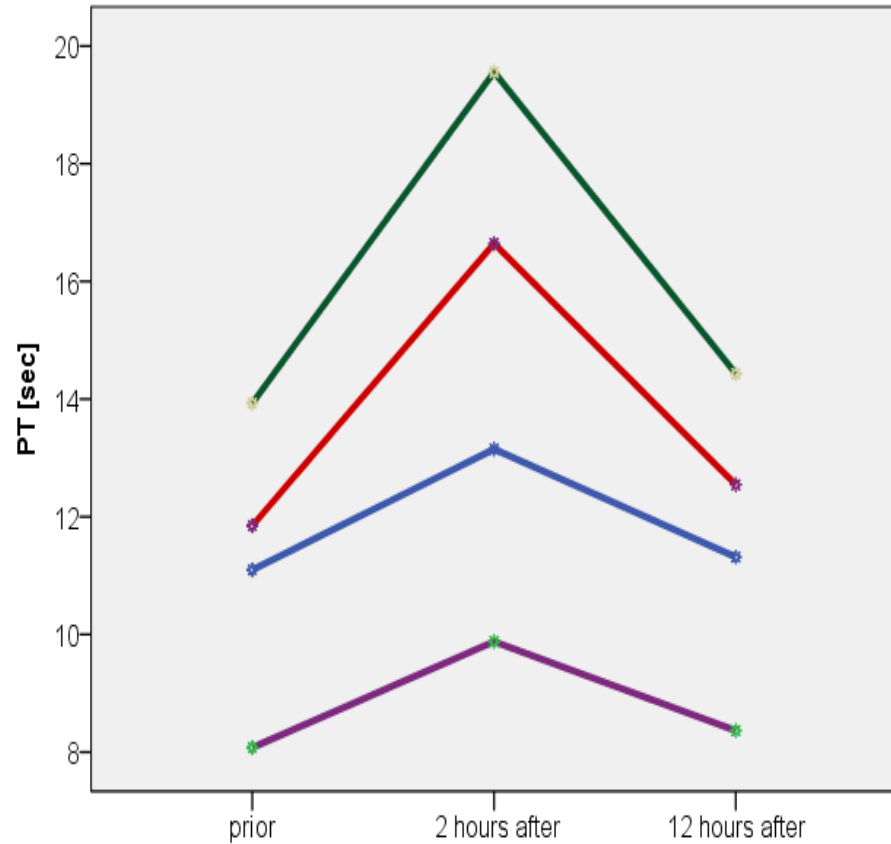

rivaroxaban 10 mg od administration

- Neoplastin Plus
- Recombiplastin
- Thromborel S
- Innovin
